# Supplementary material for: Carbon nanotube-enhanced nanocomposite organohydrogel based on a physically cross-linked double network for sensitive wearable sensors
Source: Royal Society of Chemistry journal article supplement (doi:10.1039/d2tc03364j), 2022-01-01
Supplement: d2tc03364j1.pdf [file d2tc03364j1.pdf]

## **Carbon nanotubes-enhanced nanocomposite organohydrogel based on a physically cross-linked double network for sensitive wearable sensors**

Yexiong Huang,<sup>a,b</sup> Jiabing Yu,<sup>b</sup> Ku Shu <sup>b</sup> and Xianping Chen <sup>\*b</sup>

<sup>a</sup> School of Physics and Electronic Engineering, Chongqing Normal University, Chongqing 401331, China.

<sup>b</sup> Department of Optoelectronic Engineering, Key Laboratory of Optoelectronic Technology & Systems, Education Ministry of China, Chongqing University, Chongqing, 400044 China.

\* Corresponding author. E-mail address: [xianpingchen@cqu.edu.cn](mailto:xianpingchen@cqu.edu.cn) (Xianping Chen)

**Table S1.** Compositions for the hydrogel.

| Samples       | AAM (mg) | SA (mg) | CNTs (mg) | SDS (mg) | LMA (uL) | APS (mg) | TMEDA (uL) | CaCl <sub>2</sub> (mg) | NaCl (mg) | Glycerol (mL) | Water (mL) |
|---------------|----------|---------|-----------|----------|----------|----------|------------|------------------------|-----------|---------------|------------|
| HPAAm/SA      | 4.97     | 0.35    | 0         | 0.1      | 92       | 18.9     | 40         | 0.882                  | 2.6       | 0             | 30         |
| HPAAm-CNTs/SA | 4.97     | 0.35    | 0.1       | 0.1      | 92       | 18.9     | 40         | 0.882                  | 2.6       | 0             | 30         |
| NOH           | 4.97     | 0.35    | 0.1       | 0.1      | 92       | 18.9     | 40         | 0.882                  | 2.6       | 20            | 10         |

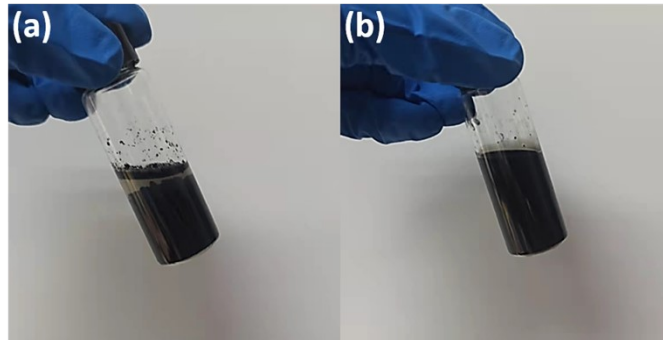

**Fig. S1.** The photos of the distribution of CNTs in (a) LMA/water, and (b) SDS/LMA solution, respectively. CNTs is easy to aggregate and delaminate in the solution without SDS. It can maintain uniform distribution in the SDS/LMA solution without any aggregation after even 24 h.

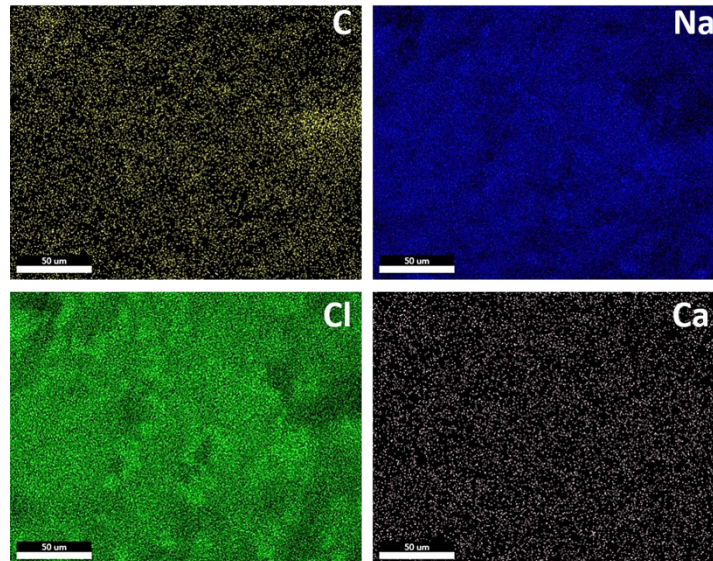

**Fig. S2.** The distribution of C, Na, Cl, and Ca element in the energy-dispersive X-ray spectroscopy (EDS) mapping.

**Table S2.** Atomic percentage of the elements.

| Element | Atomic % |
|---------|----------|
| C       | 55.03    |
| Na      | 23.70    |
| Ca      | 0.31     |
| Cl      | 20.96    |

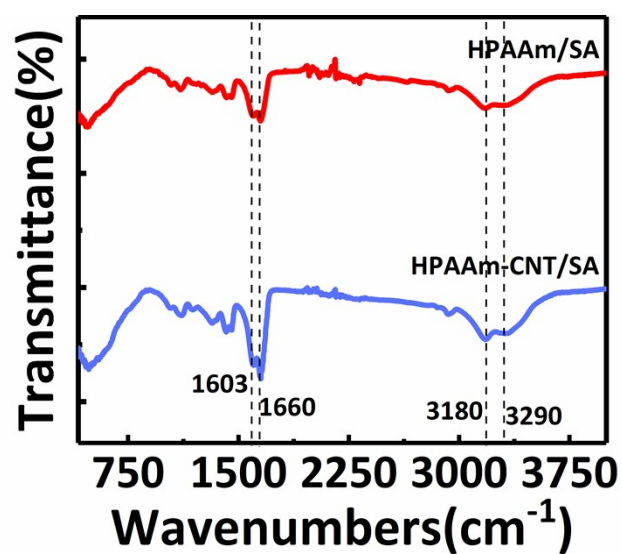

**Fig. S3.** FTIR spectra of HPAAm/SA and HPAAm-CNT/SA hydrogel.

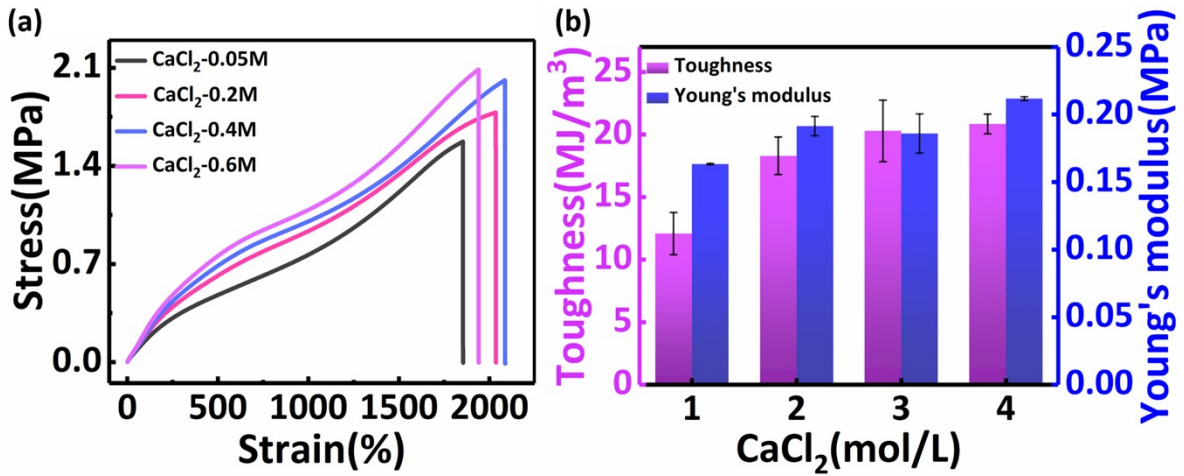

Fig. S4. Tensile stress-strain curves and the corresponding toughness and Young's modulus values of the nanocomposite organohydrogel soaking in the glycerol/water solution (20:10) with different CaCl<sub>2</sub> contents.

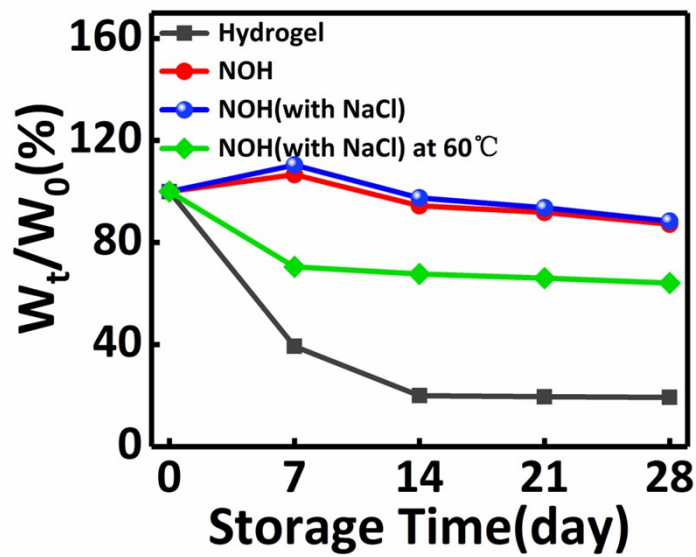

Fig. S5. Weight remaining curves of the samples were stored at room temperature and 60 °C for one month. The weight of the hydrogel decreases to the lowest value (about 20% of its initial weight) after being stored at room temperature for two weeks. In contrast, the weight of NOH at room conditions decreases slowly and still maintains 88% of its initial weight after one month. For NOH put under 60 °C, the weight decreases quickly in the first week and then decreases slowly to about 64% of its initial weight after one month.

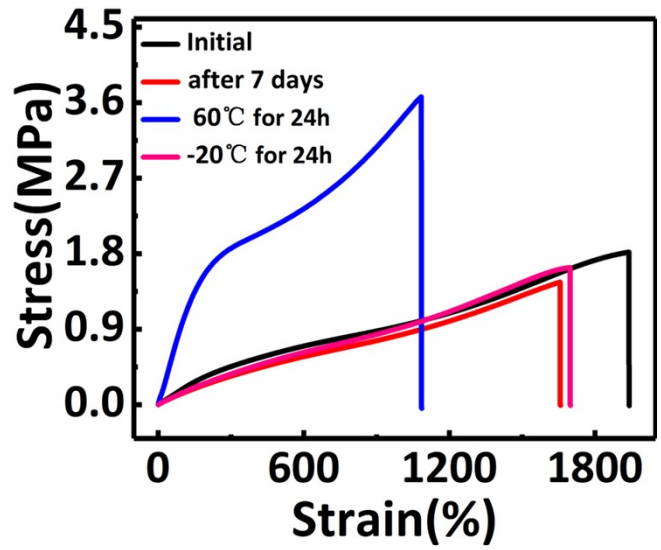

Fig. S6. Tensile stress-strain curves for NOH are stored in different environments.

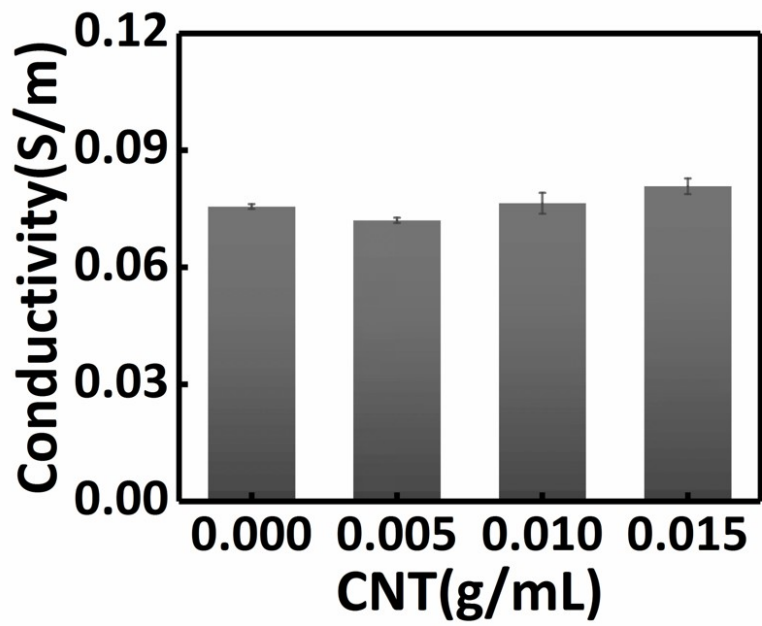

Fig. S7. Conductivity variation with different concentrations of CNTs. (glycerol/water=20:10,  $\text{CaCl}_2=0.2 \text{ M}$ ,  $\text{NaCl}=0 \text{ M}$ )

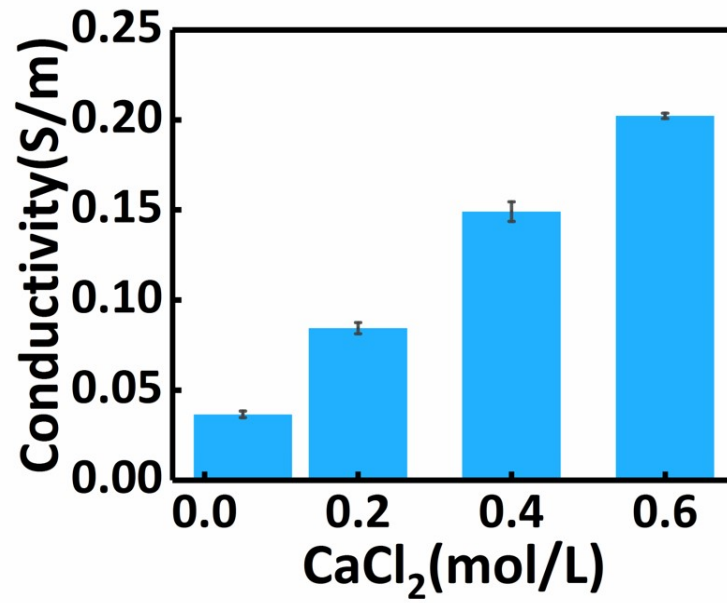

Fig. S8. Conductivity variation with different concentrations of CaCl<sub>2</sub> in the solution of glycerol/water(20:10).

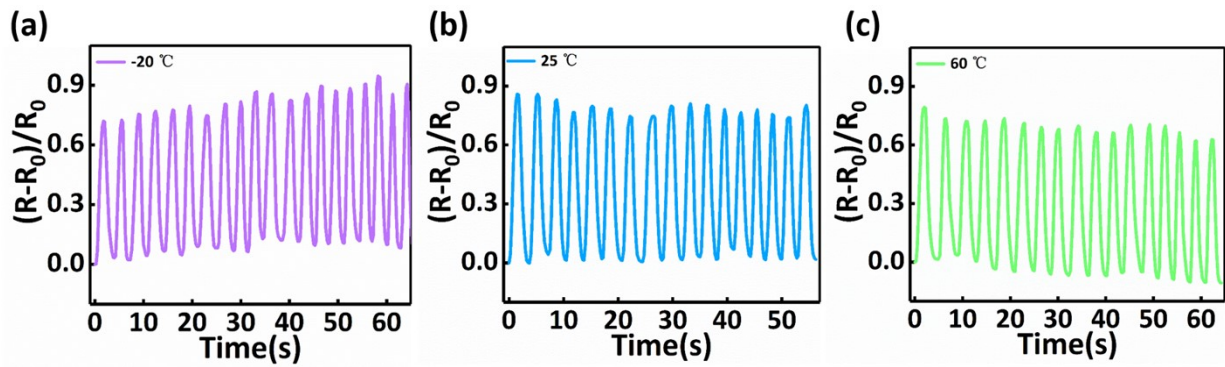

Fig. S9. Relative resistance changes for continuous bending of the finger under (a) -20 °C, (b) 25 °C, and (c) 60 °C, respectively.

**Table S3.** Comparison of important performances of the prepared nanocomposite organohydrogel and the previous works.

| Materials                 | Stress (MPa) | Strain  | Toughness (MJ/m <sup>3</sup> ) | Anti-freezing agents | Conductivity (S/m)    | GF                      | Ref.             |
|---------------------------|--------------|---------|--------------------------------|----------------------|-----------------------|-------------------------|------------------|
| HPAAm/CS-c-MWCNT          | 0.065        | 2761%   | -                              | -                    | 0.82                  | 1.65<br>(0-100%)        | 1                |
| HAPAA/PANI                | 0.9          | 2590%   | 7.85                           | -                    | 3.35                  | 2.6<br>(0-300%)         | 2                |
| HAPAM/CNC@CNT             | 0.25         | 2900%   | 3.6                            | -                    | 0.826                 | 1.65<br>(0-600%)        | 3                |
| PVA/MXene                 | 0.0054       | 1200%   | -                              | -                    | -                     | 0.4<br>(0-200%)         | 4                |
| CNTs/HAPAAm               | 0.267        | 3000%   | 3.42                           | -                    | 1.75×10 <sup>-2</sup> | 2.0<br>(0-300%)         | 5                |
| PAA-LM/rGO                | 0.1          | 2900%   | -                              | -                    | -                     | 1.77<br>(0-100%)        | 6                |
| PAAm-oxCNTs               | 0.71         | 1000%   | 2.29                           | -                    | 6.7×10 <sup>-2</sup>  | 1.5<br>(0-200%)         | 7                |
| PAM/gelatin/PEDOT:<br>PSS | 0.29         | 2850%   | -                              | -                    | -                     | 0.46%<br>(0-200%)       | 8                |
| PAAm-TA@CNF-MXene         | 0.16         | 1500%   | -                              | glycerol             | 0.19                  | 4.15<br>(0-250%)        | 9                |
| TA@HAP NWs-PVA            | 0.36         | 480%    | 0.94                           | glycerol             | -                     | 2.84<br>(0-350%)        | 10               |
| PVA/Gly/CB/CNT            | 4.84         | 640%    | 15.93                          | glycerol             | 0.17                  | 2.01<br>(0-700%)        | 11               |
| PVA/PAAm/MXene            | 0.035        | 1000%   | -                              | ethylene glycol      | 1.5×10 <sup>-2</sup>  | 5.02<br>(0-200%)        | 12               |
| PAAM/PVP/Graphene         | 0.072        | 21 000% | -                              | ethylene glycol      | -                     | 2.3                     | 13               |
| PAM/MMT/CNTs              | 0.2          | 4196%   | -                              | glycerol             | <1.0×10 <sup>-3</sup> | 2.77<br>(0-1000%)       | 14               |
| Alg-PBA/<br>PVA/PAM/rGO   | 0.064        | 610%    | -                              | ethylene glycol      | 1.1×10 <sup>-2</sup>  | 0.0112kPa <sup>-1</sup> | 15               |
| PAA/CS/GO                 | 0.226        | 1000%   | 1.12                           | glycerol             | 6.7×10 <sup>-2</sup>  | 1.138<br>(0-80%)        | 16               |
| HPAAm-CNTs/SA             | 1.56         | 1871%   | 18.3                           | glycerol             | 0.48                  | 2.85<br>(0-200%)        | <b>This work</b> |

- 1 S. Xia, S. Song, F. Jia and G. Gao, *J. Mater. Chem. B*, 2019, **7**, 4638-4648.
- 2 G. Su, S. Yin, Y. Guo, F. Zhao, Q. Guo, X. Zhang, T. Zhou and G. Yu, *Mater. Horiz.*, 2021, **8**, 1795-1804.
- 3 G. Su, J. Cao, X. Zhang, Y. Zhang, S. Yin, L. Jia, Q. Guo, X. Zhang, J. Zhang and T. Zhou, *J. Mater. Chem. A*, 2020, **8**, 2074-2082.
- 4 J. Zhang, L. Wan, Y. Gao, X. Fang, T. Lu, L. Pan and F. Xuan, *Adv. Electron. Mater.*, 2019, **5**, 1900285.
- 5 Z. Qin, X. Sun, Q. Yu, H. Zhang, X. Wu, M. Yao, W. Liu, F. Yao and J. Li, *ACS Appl. Mater. Interfaces*, 2020, **12**, 4944-4953.
- 6 Z. Zhang, L. Tang, C. Chen, H. Yu, H. Bai, L. Wang, M. Qin, Y. Feng and W. Feng, *J. Mater. Chem. A*, 2021, **9**, 875-883.
- 7 X. Sun, Z. Qin, L. Ye, H. Zhang, Q. Yu, X. Wu, J. Li and F. Yao, *Chem. Eng. J.*, 2020, **382**, 122832.
- 8 H. Sun, Y. Zhao, C. Wang, K. Zhou, C. Yan, G. Zheng, J. Huang, K. Dai, C. Liu and C. Shen, *Nano Energy*, 2020, **76**, 105035.
- 9 Y. Wei, L. Xiang, H. Ou, F. Li, Y. Zhang, Y. Qian, L. Hao, J. Diao, M. Zhang, P. Zhu, Y. Liu, Y. Kuang and G. Chen, *Adv. Funct. Mater.*, 2020, **30**, 2005135.
- 10 J. Wen, J. Tang, H. Ning, N. Hu, Y. Zhu, Y. Gong, C. Xu, Q. Zhao, X. Jiang, X. Hu, L. Lei, D. Wu and T. Huang, *Adv. Funct. Mater.*, 2021, 2011176.
- 11 J. Gu, J. Huang, G. Chen, L. Hou, J. Zhang, X. Zhang, X. Yang, L. Guan, X. Jiang and H. Liu, *ACS Appl. Mater. Interfaces*, 2020, **12**, 40815-40827.
- 12 H. Liao, X. Guo, P. Wan and G. Yu, *Adv. Funct. Mater.*, 2019, **29**, 1904507.
- 13 H. Zhang, W. Niu and S. Zhang, *ACS Appl. Mater. Interfaces*, 2018, **10**, 32640-32648.
- 14 H. Sun, Y. Zhao, S. Jiao, C. Wang, Y. Jia, K. Dai, G. Zheng, C. Liu, P. Wan and C. Shen, *Adv. Funct. Mater.*, 2021, 2101696.

- 15 D. Ma, X. Wu, Y. Wang, H. Liao, P. Wan and L. Zhang, *ACS Appl. Mater. Interfaces*, 2019, **11**, 41701-41709.
- 16 S. Xia, S. Song, Y. Li and G. Gao, *J. Mater. Chem. C*, 2019, **7**, 11303-11314.
